# Supplementary material
Source: PubMed Central journal article supplement (PMC9107773)
Supplement: NIHMS1804536-supplement-supplement.pdf [file NIHMS1804536-supplement-supplement.pdf]

---

**Supplementary information**

---

**Trauma-induced coagulopathy**

---

In the format provided by the  
authors and unedited

## Supplementary information

Table S1: Civilian studies addressing haemorrhagic deaths

| Studies                       | Year(s) covered by study | Setting                                | % blunt trauma | % of pre-hospital deaths due to haemorrhage | % of in-hospital deaths due to haemorrhage |
|-------------------------------|--------------------------|----------------------------------------|----------------|---------------------------------------------|--------------------------------------------|
| Sauaia et al. <sup>1</sup>    | 1992                     | Population-based Denver, CO            | 51%            | 36%                                         | 41%                                        |
| Shackford et al. <sup>2</sup> | 1992                     | Population-based S. Diego, CA          | 71%            | 31%                                         |                                            |
| Stewart et al. <sup>3</sup>   | 1995-2001                | Hospital-based S. Antonio, TX          | 71%            | NA                                          | 21%*                                       |
| Tien et al. <sup>4</sup>      | 1999-2003                | Hospital-based Toronto, Canada         | 87%            | NA                                          | 15%                                        |
| Evans et al. <sup>5</sup>     | 2005                     | Population-based Newcastle, Australia  | 86%            | 33%                                         |                                            |
| Consunji et al. <sup>6</sup>  | 2004-2007                | Hospital-based Manila, Philippines     | 41%            | NA                                          | 28%                                        |
| Soreide et al. <sup>7</sup>   | 2010                     | Population-based Stavanger, Norway     | 87%            | 12.5%***                                    | 12.5%***                                   |
| Kahl et al. <sup>8</sup>      | 2000-2011                | Hospital-based S. Diego, CA            | 69%            | NA                                          | 28%                                        |
| Kleber et al. <sup>9</sup>    | 2010                     | Population-based Berlin, Germany       | 87%            | 14%#                                        | 4%#                                        |
| Trajano et al. <sup>10</sup>  | 1995, 2000, 2005, 2010   | Hospital-based Campinas, Brazil        | 73%            | NA                                          | 18%                                        |
| Davis et al. <sup>11</sup>    | 2011                     | Population-based Miami-Dade County, FL | 53%            | 34%                                         | NA                                         |
| Roberts et al. <sup>12</sup>  | 2005-2013                | Hospital-based Calgary, Canada         | 94%            | NA                                          | 27%                                        |
| Arsilan et al. <sup>13</sup>  | 2010-2013                | Hospital-based Ankara, Turkey          | 85%            | 28%‡                                        | 29%                                        |
| Oyenyi et al. <sup>14</sup>   | 2005-2006 and 2012-2013  | Hospital-based Houston, TX             | 81-80%         | NA                                          | 2005-2006: 36%<br>2007-2013: 25%           |
| Drake et al. <sup>15</sup> ** | 2014                     | Population-based Harris County, TX     | 62%            | 20%                                         | 20%                                        |
| Jochems et al. <sup>16</sup>  | 2007-2016                | Hospital-based Utrecht, Netherlands    | 98%            | NA                                          | 2007-2012: 9%<br>2013-2016: 3%             |
| Callcut et al. <sup>17</sup>  | 2015-2017                | Hospital-based 18 centers across US    | 73%            | NA                                          | 23%                                        |

\*Attributed to shock; \*\*18% of the trauma-related deaths occurred after the index hospitalization, of which 5(1%) were attributed to hemorrhage; \*\*\*authors estimation based on the time from injury to death reported in original study; # definition excludes 'polytrauma deaths'; ‡ death at scene or during transport but transported to the hospital

Table S2: Epidemiologic studies of trauma-induced coagulopathy (TIC) since 2000

| Study                                 | Publication year | Study period | TIC definition                                                                               | Population                                          | Country        | Blunt trauma | ISS | Hypotension/Shock | TIC Incidence                          | TIC Case-fatality | Timing of TIC   | Injury pattern                                                              | Risk Factors for TIC |
|---------------------------------------|------------------|--------------|----------------------------------------------------------------------------------------------|-----------------------------------------------------|----------------|--------------|-----|-------------------|----------------------------------------|-------------------|-----------------|-----------------------------------------------------------------------------|----------------------|
| <b>Raum et al.</b> <sup>18</sup>      | 2001             | 1993-1999    | PT<60% than normal plasma                                                                    | 1351 adult trauma patients with ISS>15, multicenter | Germany        | NA           | 30  | NA                | 27%                                    | 47%               | ED              | NA                                                                          | ISS, hypoperfusion   |
| <b>Keller et al.</b> <sup>19</sup>    | 2001             | 1999-2000    | INR>1.2                                                                                      | 56 children with blunt TBI, single center           | US             | 100%         | NA  | NA                | 38%                                    | 35%               | ED              | TBI                                                                         | GCS<=9               |
| <b>Brohi et al.</b> <sup>20</sup>     | 2003             | 1993-1998    | PT>18s, PTT>60s, TT>15s (1.5 x normal)                                                       | 1088 helicopter-transported patients, single center | United Kingdom | 75%          | 20  | 18%               | 24%                                    | 46%               | ED              | TIC less frequent in isolated TBI                                           | hypoperfusion        |
| <b>McLeod et al.</b> <sup>21</sup>    | 2003             | 1995-2000    | PT>14s or PTT>34s                                                                            | 10,790 injured adults, single center                | US             | NA           | 9   | 12%               | 28%                                    | 19%               | ED              | NA                                                                          | NA                   |
| <b>Carrick et al.</b> <sup>22</sup>   | 2005             | 2001-2003    | PT>14.2s or PTT > 38.4s                                                                      | 184 adults with blunt TBI, single center            | US             | 100%         | 17  |                   | 21% upon admission, 41% within 72hours | 62%               | ED and 72 hours | severity of TBI associated with TIC                                         | Severity of TBI      |
| <b>Affonseca et al.</b> <sup>23</sup> | 2007             | 1998-2003    | Prothrombin activity < 70%, PT>16s, PTT 10s>control time, platelets< 150,000/mm <sup>3</sup> | 301 children with blunt TBI                         | Brazil         | 100%         | NA  | 27%               | 76%                                    | 40%               | ED              | TIC correlated with TBI severity, TIC not related to extra cranial injuries | Severity of TBI      |
| <b>Rugeri et al.</b> <sup>24</sup>    | 2007             | 2004         | INR>1.6 or PTT>60s or platelets< 100,000/mm <sup>3</sup> or fibrinogen <1g/L                 | 88 adults admitted to TRU, single center            | US             | NA           | 22  | NA                | 28%                                    | NA                | TRU             | NA                                                                          | NA                   |

| Study                                 | Publication year | Study period                | TIC definition                                              | Population                                                           | Country                                          | Blunt trauma | ISS                      | Hypotension/Shock                       | TIC Incidence                    | TIC Case-fatality        | Timing of TIC                         | Injury pattern                     | Risk Factors for TIC                                                                    |
|---------------------------------------|------------------|-----------------------------|-------------------------------------------------------------|----------------------------------------------------------------------|--------------------------------------------------|--------------|--------------------------|-----------------------------------------|----------------------------------|--------------------------|---------------------------------------|------------------------------------|-----------------------------------------------------------------------------------------|
| <b>Maegele et al.</b> <sup>25</sup>   | 2007             | 2007 (period not specified) | PT (Quick's value) <70%, platelets <100,000/mm <sup>3</sup> | 8724 adults, multicenter                                             | Germany                                          | 96%          | 30 in TIC; 21 in non-TIC | NA                                      | 34%                              | 28%                      | ED                                    | TIC less frequent in isolated head | ISS, pre-hospital fluids                                                                |
| <b>Niles et al.</b> <sup>26</sup>     | 2008             | 2003-2004                   | INR>=1.5                                                    | 347 combat patients who received RBC, single combat support hospital | US-Iraq conflict                                 | 8%           | 17                       | 25% required massive transfusion        | 38%                              | 24%                      | admission                             | NA                                 | NA                                                                                      |
| <b>Kashuk et al.</b> <sup>27</sup>    | 2008             | 2001-2006                   | INR>1.5                                                     | 133 adults who received >10 units RBC in 6 hours, single center      | US                                               | 56%          | 36                       | 100%                                    | 30%                              | NA                       | first 6 hours post hospital admission | NA                                 | ED temperature <34°C                                                                    |
| <b>Talving et al.</b> <sup>28</sup>   | 2009             | 2005-2007                   | platelets <100,000/mm <sup>3</sup> , INR>1.1, PTT>36s       | 436 adults with TBI                                                  | US                                               | 32-33%       | NA                       | 4%                                      | 36% all TBI, 34% in isolated TBI | 49%                      | ED                                    | TBI                                | GCS<8, cerebral edema, SAH, midline shift                                               |
| <b>Frith et al.</b> <sup>29</sup>     | 2010             | 2007-                       | INR>1.2 and INR>1.5                                         | 3646 adults, multicenter                                             | United Kingdom, Germany, Netherlands, Norway, US | 90%          | 22                       | 24%                                     | INR>1.2 36%, INR>1.5 19%         | INR>1.2 23%, INR>1.5 28% | ED                                    | NA                                 | Combination of tissue injury and Shock                                                  |
| <b>Wafaisade et al.</b> <sup>30</sup> | 2010             | 1993-2007                   | PT (Quick's value) <70%, platelets <100,000/mm <sup>3</sup> | 3,114 adults with blunt, isolated TBI, multicenter                   | Germany                                          | 100%         | TIC 25 non-TIC 21        | Median SBP (mmHg): TIC: 125 non-TIC 134 | 23%                              | 50%                      | ED                                    | Isolated TBI                       | age>=75yrs, pre-hospital fluids>=2000ml, shock at scene or ED, GCS<9 at scene, AIS head |

| Study                                 | Publication year | Study period            | TIC definition                                                                                                                              | Population                                                     | Country     | Blunt trauma | ISS                        | Hypotension/Shock                       | TIC Incidence                                                                                                               | TIC Case-fatality                                                                                   | Timing of TIC | Injury pattern                                     | Risk Factors for TIC                                                                                                  |
|---------------------------------------|------------------|-------------------------|---------------------------------------------------------------------------------------------------------------------------------------------|----------------------------------------------------------------|-------------|--------------|----------------------------|-----------------------------------------|-----------------------------------------------------------------------------------------------------------------------------|-----------------------------------------------------------------------------------------------------|---------------|----------------------------------------------------|-----------------------------------------------------------------------------------------------------------------------|
| <b>Wafaisade et al.</b> <sup>31</sup> | 2010             | 2002-2007               | PT (Quick's value) <70%, platelets <100,000/mm <sup>3</sup>                                                                                 | 1987 adults with ISS>15, multicenter                           | Germany     | 95%          | TIC 36 non-TIC: 28         | Median SBP (mmHg) TIC: 104 non-TIC: 123 | 36%                                                                                                                         | 26%                                                                                                 | ED            | NA                                                 | ISS, AIS abdomen, shock at scene or ED, ratio of prehospital colloids: crystalloids ≥1.2. prehospital fluids ≥3000 ml |
| <b>Dirks et al.</b> <sup>32</sup>     | 2010             | 2001-2003 and 2005-2007 | PTT>35s                                                                                                                                     | 253 adults who required ≥1 red blood cells unit, single center | Denmark     | 85%          | 2001-03: 20<br>2005-07: 24 | NA                                      | PTT 2001-03: 27%<br>2005-07: 34%                                                                                            | 49%                                                                                                 | ED            | NA                                                 | NA                                                                                                                    |
| <b>Jeger et al.</b> <sup>33</sup>     | 2010             | 2007-2008               | INR>1.5 and PTT>60s or TT>15s                                                                                                               | 172 adults with ISS>15, single center                          | Switzerland | NA           | 25                         | NA                                      | 33%                                                                                                                         | NA                                                                                                  | ED            | NA                                                 | NA                                                                                                                    |
| <b>Tauber et al.</b> <sup>34</sup>    | 2011             | 2005-2008               | FIBTEM MCF<7mm, EXTEM MCF<45mm, EXTEM CFT>200s, EXTEM CT>100s, fibrinogen <150mg/dL or INR>1.5 or PTT>50s, platelets<100000/mm <sup>3</sup> | Adults with polytrauma patients, single center                 | Austria     | 100%         | 34                         | 16%                                     | 26% fibrinogen <150mg/L, 30% impaired fibrin polymerization, 22% reduced clot firmness<br>INR>1.5 14%, 7% hyperfibrinolysis | Hyperfibrinolysis 57%; FIBTEM MCF<7mm 21%, EXTEM>100 s 46%, EXTEM CFT>200 s 27%, EXTEM MCF<45mm 25% | ED            | Hyperfibrinolysis associated with abdominal trauma | TBI, abdominal trauma (hyperfibrinolysis), acidosis, hypothermia, hypoperfusion, ISS                                  |
| <b>Johansson et al.</b> <sup>35</sup> | 2011             | 2010                    | PTT > 35s, INR > 1.2                                                                                                                        | 80 adults, single center                                       | Denmark     | 91%          | 17                         | Median shock index 0.62                 | 15%                                                                                                                         | 50%                                                                                                 | ED            | NA                                                 | ISS, hypoperfusion                                                                                                    |

| Study                                   | Publication year | Study period | TIC definition                                                                   | Population                                                                  | Country                                               | Blunt trauma | ISS              | Hypotension/Shock                | TIC Incidence                      | TIC Case-fatality                                                                                      | Timing of TIC           | Injury pattern | Risk Factors for TIC |
|-----------------------------------------|------------------|--------------|----------------------------------------------------------------------------------|-----------------------------------------------------------------------------|-------------------------------------------------------|--------------|------------------|----------------------------------|------------------------------------|--------------------------------------------------------------------------------------------------------|-------------------------|----------------|----------------------|
| <b>Greuters et al.</b> <sup>36</sup>    | 2011             | 2003-2007    | PTT >40s, INR >1.2, platelets <120,000/mm <sup>3</sup>                           | 107 adults with isolated TBI                                                | Netherlands                                           | 93%          | 25               | NA                               | ED: 24%; 24 hours postinjury : 40% | NA                                                                                                     | ED, 24 hours postinjury | Isolated TBI   | NA                   |
| <b>Patregnani et al.</b> <sup>37</sup>  | 2012             | 2002-2009    | INR ≥ 1.5                                                                        | 744 children in US combat support hospitals in Iraq and Afghanistan         | U.S. combat support hospitals in Iraq and Afghanistan | 17%          | 10               | 38%                              | 27%                                | 22%                                                                                                    | ED                      | NA             | ISS, shock           |
| <b>Hendrickson et al.</b> <sup>38</sup> | 2012             | 2006-2010    | PT >15.9s, PTT >42.1s, fibrinogen <180 mg/dL, platelets <185,000/mm <sup>3</sup> | 102 children requiring blood products, single center                        | US                                                    | 80%          | 20               | NA                               | 77%                                | NA (increased mortality odds associated with abnormal PT, PTT, and platelet count, but not fibrinogen) | ED                      | TBI            | ISS, GCS             |
| <b>Mitra et al.</b> <sup>39</sup>       | 2012             | 2005-2008    | INR >1.5 or PTT >60 s                                                            | 772 adults with ISS >15 who required ≥1 red blood cells unit, single center | Australia                                             | 92%          | 29               | 37% required massive transfusion | 25%                                | 38%                                                                                                    | ED                      | NA             | NA                   |
| <b>Peiniger et al.</b> <sup>40</sup>    | 2012             | 2002-2008    | PT test (Quick value) <70%; PTT >38s, platelets <100,000/mm <sup>3</sup>         | 200 children with isolated blunt TBI, multicenter                           | Germany                                               | 100%         | NA (51% GCS <=8) | 38%                              | GCS <=8: 44%<br>GCS >8: 14%        | GCS <=8: 52%                                                                                           | ED                      | TBI            | GCS <=8              |

| Study                               | Publication year | Study period | TIC definition                                         | Population                                          | Country | Blunt trauma | ISS | Hypotension/Shock                | TIC Incidence                                     | TIC Case-fatality                                                          | Timing of TIC          | Injury pattern                    | Risk Factors for TIC                                                                 |
|-------------------------------------|------------------|--------------|--------------------------------------------------------|-----------------------------------------------------|---------|--------------|-----|----------------------------------|---------------------------------------------------|----------------------------------------------------------------------------|------------------------|-----------------------------------|--------------------------------------------------------------------------------------|
| <b>Genét et al.</b> <sup>41</sup>   | 2013             | NA           | INR>1.2, PTT> 35s                                      | 80 adult trauma patients, single center             | Denmark | 91%          | 17  | median shock index 0.62          | TBI+other trauma: 47% isolated TBI 13% non-TBI 5% | NA                                                                         | ED                     | NA                                | NA                                                                                   |
| <b>Chhabra et al.</b> <sup>42</sup> | 2013             | 2008-2010    | INR>1.5 and PTT>1.5 x control time                     | 208 adults with isolated TBI, single center         | India   | NA           | NA  | NA                               | 46%                                               | 30%                                                                        | ED and 72 hours        | effaced basal cisterns on CT scan | GCS ≤ 8, effaced basal cisterns on CT scan, Hemoglobin <10 g/dl and D-dimer >1 µg/dl |
| <b>Xu et al.</b> <sup>43</sup>      | 2013             | 2008-2009    | PT > 18s, INR > 1.6, PTT > 60s                         | 223 adults with blunt trauma, ISS>15, single center | China   | 100%         | 33  | 14% base deficit >6mEq/L         | 23%                                               | 37%                                                                        | ICU                    |                                   | Base deficit ≥6 mEq/L, GCS <=8, platelet count                                       |
| <b>Alexiou et al.</b> <sup>44</sup> | 2014             | 2008-2012    | PTT>40s, INR > 1.2, platelet <120,000 /mm <sup>3</sup> | 149 adults with isolated TBI                        | Greece  | NA           | NA  | NA                               | 23%                                               | NA                                                                         | 24 hours postadmission | Isolated TBI                      | Glucose >151 mg/dl, Hemoglobin <12.4 mg/dL                                           |
| <b>Neal et al.</b> <sup>45</sup>    | 2014             | 2003-2010    | INR>1.5                                                | 1897 adults with blunt trauma, multicenter          | US      | 100%         | 34  | 52%                              | 22%                                               | NA                                                                         | ED                     | NA                                | Time from injury, age, hypoperfusion, serious comorbidity                            |
| <b>MacLeod et al.</b> <sup>46</sup> | 2014             | 2008-2009    | PT>13.3s                                               | 701 adult trauma patients, single center            | US      | 74%          | 9   | Pre-hospital median SBP 130 mmHg | 16%                                               | 9% in PT 13.4-15.5s; 26% in PT 15.6-17.5s; 33% in PT 18-20s; 36% in PT>20s | ED                     | NA                                | TBI, ISS and hypotension                                                             |

| Study                            | Publication year | Study period | TIC definition                                                                                         | Population                                                        | Country | Blunt trauma | ISS                                                      | Hypotension/Shock  | TIC Incidence                                               | TIC Case-fatality                                           | Timing of TIC | Injury pattern | Risk Factors for TIC                                                                                                                                                       |
|----------------------------------|------------------|--------------|--------------------------------------------------------------------------------------------------------|-------------------------------------------------------------------|---------|--------------|----------------------------------------------------------|--------------------|-------------------------------------------------------------|-------------------------------------------------------------|---------------|----------------|----------------------------------------------------------------------------------------------------------------------------------------------------------------------------|
| Moore et al. <sup>47</sup>       | 2014             | 2010-2013    | TEG LY30: hyperfibrinolysis ( $\geq 3\%$ )                                                             | 180 adults with ISS $>15$ , single center                         | US      | 79%          | 29                                                       | Median SBP 104mmHg | Hyperfibrinolysis 18%                                       | Hyperfibrinolysis 45%                                       | field or ED   | NA             | NA                                                                                                                                                                         |
| Tonglet et al. <sup>48</sup>     | 2014             | 2012-2013    | 20% abnormality in ROTEM, INR $>1.3$ , or fibrinogen $<150\text{mg/dL}$ at admission or 3 hours later. | 82 adults with severe blunt trauma, single center                 | Belgium | 100%         | 13                                                       | 13%                | 13%                                                         | 55%                                                         | ED            | NA             | NA                                                                                                                                                                         |
| Kutcher et al. <sup>49</sup>     | 2015             | 2003-2011    | INR $>1.2$                                                                                             | 1,537 adults with blunt trauma and hemorrhagic shock, multicenter | US      | 100%         | 33                                                       | 65%                | 38%                                                         | 23%                                                         | ED            |                | Age $<20\text{yrs}$ , GCS, transport time, ISS, lower pH, lower temperature, 2-4L of pre-hospital fluids if high lactate, $>4$ L pre-hospital fluids regardless of lactate |
| de Oliveira et al. <sup>50</sup> | 2015             | 2007         | INR $>1.5$ , PTT $>60\text{s}$ , platelets $<100,000/\text{mm}^3$                                      | 345 adults with ISS $>15$ , single center                         | Canada  | NA           | Isolated TBI: 21<br>TBI+other injuries: 37<br>No TBI: 25 | NA                 | Isolated TBI: 13%<br>TBI+other injuries: 31%<br>No TBI: 23% | Isolated TBI: 66%<br>TBI+other injuries: 48%<br>No TBI: 19% | ED            |                | ISS, severe trauma with no TBI, hypoperfusion                                                                                                                              |



| Study                                   | Publication year | Study period | TIC definition                                                 | Population                                                                                | Country                                   | Blunt trauma                   | ISS                                   | Hypotension/Shock                                        | TIC Incidence                       | TIC Case-fatality                 | Timing of TIC | Injury pattern                                    | Risk Factors for TIC                                                  |
|-----------------------------------------|------------------|--------------|----------------------------------------------------------------|-------------------------------------------------------------------------------------------|-------------------------------------------|--------------------------------|---------------------------------------|----------------------------------------------------------|-------------------------------------|-----------------------------------|---------------|---------------------------------------------------|-----------------------------------------------------------------------|
| <b>Peltan et al.</b> <sup>51</sup>      | 2015             | 2003-2010    | INR>1.2 and INR>1.5                                            | 1031 adults with blunt trauma requiring $\geq 1$ RBC, multicenter                         | US                                        | 100%                           | 33                                    | 23%                                                      | 50% INR >1.2 and 21% INR >1.5       | 19% INR >1.2 and 27% INR >1.5     | ED            | Femur fractures associated with INR>1.5           | Age, hypotension, ISS, APACHE II, BMI, lung contusion, femur fracture |
| <b>Khan et al.</b> <sup>52</sup>        | 2015             | 2009-2013    | ROTEM CA5 $\leq 35$ mm                                         | 106 trauma patients who received >3 RBC, multicenter                                      | UK, Norway, Denmark, Germany, Netherlands | 87%                            | 34                                    | 46%                                                      | 40%                                 | NA                                | ED            | NA                                                | NA                                                                    |
| <b>Hagemo et al.</b> <sup>53</sup>      | 2015             | 2007-2011    | INR>1.2                                                        | 808 adults, multicenter                                                                   | UK, Denmark and Norway                    | 82%                            | 16                                    | 6% required massive transfusion                          | 11%                                 | NA                                | ED            | NA                                                | NA                                                                    |
| <b>Holcomb et al.</b> <sup>54</sup>     | 2015             | 2012-2013    | INR>1.5                                                        | 680 adults who required $\geq 1$ red blood cells unit, multicenter (RCT)                  | US                                        | 53%                            | 26                                    | 39%                                                      | 17%                                 | NA                                | ED            | NA                                                | NA                                                                    |
| <b>Strumwasser et al.</b> <sup>55</sup> | 2016             | 2004-2009    | INR $\geq 1.5$ , PTT> 36s, platelets <100,000 /mm <sup>3</sup> | 20,126 (7.6% pediatric, 92.4% adult) trauma patients, single center                       | US                                        | 87% in children; 77% in adults | ISS>15: 15% children; 17% in adults   | 0.8% in children; 3% in adults                           | 5.8% in children and 8.4% in adults | 14% in children and 18% in adults | ED            | TBI associated with TIC especially in the elderly | TBI, age, hypoperfusion, tissue injury                                |
| <b>Peltan et al</b> <sup>56</sup>       | 2016             | 2008-2013    | INR > 1.5                                                      | Derivation: 1963 adults with blunt trauma, multicenter; Validation: 285 adults with blunt | US                                        | 100%                           | no TIC 17, TIC 26 (derivation) and 32 | Derivation: 28% SBP<130mmHg; Validation: 37% SBP<117mmHg | Derivation 6%; Validation 9%        | Derivation 46%                    | ED            | NA                                                | Injury severity and hypoperfusion                                     |

| Study                               | Publication year | Study period | TIC definition                                                      | Population                                                              | Country | Blunt trauma | ISS (validation)   | Hypotension/Shock                       | TIC Incidence                                                           | TIC Case-fatality     | Timing of TIC | Injury pattern | Risk Factors for TIC                                       |
|-------------------------------------|------------------|--------------|---------------------------------------------------------------------|-------------------------------------------------------------------------|---------|--------------|--------------------|-----------------------------------------|-------------------------------------------------------------------------|-----------------------|---------------|----------------|------------------------------------------------------------|
| <b>Moore et al.</b> <sup>57</sup>   | 2016             | 2010-2013    | Hyperfibrinolysis (HF) (LY30 >=3.0%)                                | 2540 adults with ISS>15, multicenter                                    | US      | 83%          | 25                 | 19%                                     | 18% with hyperfibrinolysis                                              | Hyperfibrinolysis 34% | ED            | NA             | Hypotension, penetrating mechanism and higher ISS          |
| <b>David et al.</b> <sup>58</sup>   | 2017             | 2011-2015    | Fibrinogen <150mg/dL, INR> 1.5, platelets <100,000 /mm <sup>3</sup> | 485 adult trauma patients                                               | France  | 93%          | 26                 | Median shock Index 0.76                 | 23%                                                                     | 54%                   | ED            | NA             | Vasopressor administration, ISS, shock index, fluid volume |
| <b>Koami et al.</b> <sup>59</sup>   | 2017             | 2013-2015    | JAAM DIC criteria>3                                                 | 72 adults with blunt trauma, single center                              | Japan   | 100%         | 29 TIC, 12 non-TIC | 8%                                      | 29% (patients with anti-coagulants and with liver disease not excluded) | 19%                   | ED            | NA             | shock, ISS, fluid volume                                   |
| <b>Mistral et al.</b> <sup>60</sup> | 2017             | 2015-2016    | INR>1.1                                                             | 98 adults with severe trauma (shock, transfusion or high risk injuries) | France  | 88%          | NA                 | 19%                                     | 53%                                                                     | 25%                   | ED            | NA             | NA                                                         |
| <b>Mador et al.</b> <sup>61</sup>   | 2017             | 2007         | INR>1.5, Abnormal TEG                                               | 628 adult trauma patients, single center                                | Canada  | 96%          | 25                 | 28% required transfusion/first 24 hours | Abnormal TEG 13% INR>1.5                                                | NA                    | ED            | NA             | Older age                                                  |

| Study                               | Publication year | Study period | TIC definition                                                                                                                                                                                            | Population                                                             | Country | Blunt trauma                      | ISS | Hypotension/Shock                        | TIC Incidence                                                                          | TIC Case-fatality                                                                 | Timing of TIC   | Injury pattern                                            | Risk Factors for TIC                                                                                                                                 |
|-------------------------------------|------------------|--------------|-----------------------------------------------------------------------------------------------------------------------------------------------------------------------------------------------------------|------------------------------------------------------------------------|---------|-----------------------------------|-----|------------------------------------------|----------------------------------------------------------------------------------------|-----------------------------------------------------------------------------------|-----------------|-----------------------------------------------------------|------------------------------------------------------------------------------------------------------------------------------------------------------|
| <b>Liras et al.</b> <sup>62</sup>   | 2017             | 2010-2016    | TIC:<br>ACT $\geq$ 128s,<br>angle $\leq$ 65°,<br>MA $\leq$ 55 mm,<br>LY30 $\geq$ 3%                                                                                                                       | 956 children with severe trauma, single center                         | US      | 72%                               | 14  | SBP TIC<br>120mmHg<br>non-TIC<br>122mmHg | Overall<br>57%;<br>TBI 62%;<br>Age $\leq$ 5yrs<br>65%                                  | Overall<br>12%;<br>TBI: 31%;<br>Age $\leq$ 5yrs:<br>11%                           | ED              | No differences in injury patterns between TIC and non-TIC | Overall:<br>field<br>intubation,<br>ED<br>hypotension;<br>TBI: head<br>AIS, field<br>and ED<br>hypotension;<br>Age $\leq$ 5yrs:<br>ED<br>hypotension |
| <b>Moore et al.</b> <sup>63</sup>   | 2018             | 2014-2017    | INR $>$ 1.3;<br>Abnormal<br>TEG<br>(ACT $>$ 128s,<br>MA $<$ 55mm,<br>Angle $\leq$ 65°,<br>LY30 $>$ 3%)                                                                                                    | 125 adult trauma patients with pre-hospital shock, single center (RCT) | US      | 50%                               | 27  | 100%                                     | Field:<br>INR $>$ 1.3<br>6%; Abnl<br>TEG 44%<br>ED:<br>INR $>$ 1.3<br>34%; Abnl<br>56% | Field<br>INR $>$ 1.3;<br>Abnl TEG 0<br>ED:<br>INR $>$ 1.3<br>32%; Abnl<br>TEG 20% | Field and<br>ED | NA                                                        | NA                                                                                                                                                   |
| <b>Dwivedi et al.</b> <sup>64</sup> | 2018             | 2015-2016    | Platelets<br>$<$ 100,000/mm <sup>3</sup> ,<br>bleeding or<br>clotting time $>$<br>lab upper<br>range,<br>INR $>$ 1.5,<br>PTT $>$ 10s<br>above control,<br>D-dimer $>$ 0.5<br>mg/l, and<br>FDP $>$ 10 mg/l | 152 adults and 48 children with TBI, single center                     | India   | 97% in adults,<br>96% in children | NA  | NA                                       | Adult<br>61%;<br>Children<br>29%                                                       | Adult 63%;<br>Children<br>50%                                                     | ED              | TBI                                                       | GCS $\leq$ 8                                                                                                                                         |
| <b>Sperry et al.</b> <sup>65</sup>  | 2018             | 2014-2017    | INR $>$ 1.3;<br>Abnormal<br>TEG<br>(ACT $>$ 128s,<br>MA $<$ 55mm,<br>Angle $\leq$ 65°,<br>Hyperfibrinolysis<br>LY30 $>$ 3%)                                                                               | 501 air-transported adults in shock, multicenter (RCT)                 | US      | 82%                               | 22  | 100%                                     | INR $>$ 1.3<br>45%;<br>Abnl TEG<br>59%                                                 | ED:<br>INR $>$ 1.3<br>34%; Abnl<br>TEG 29%                                        | ED              | NA                                                        | NA                                                                                                                                                   |

| Study                                     | Publication year | Study period | TIC definition                                                                         | Population                                   | Country                                                                                      | Blunt trauma | ISS                       | Hypotension/Shock                                | TIC Incidence | TIC Case-fatality | Timing of TIC | Injury pattern           | Risk Factors for TIC                                                                |
|-------------------------------------------|------------------|--------------|----------------------------------------------------------------------------------------|----------------------------------------------|----------------------------------------------------------------------------------------------|--------------|---------------------------|--------------------------------------------------|---------------|-------------------|---------------|--------------------------|-------------------------------------------------------------------------------------|
| <b>Fröhlich et al.</b> <sup>66</sup>      | 2019             | 2002-2013    | Quick's value < 70%, platelets < 100,000/mm <sup>3</sup>                               | 61,212 adults, multicenter                   | Germany                                                                                      | 95%          | 22 in 2002 and 18 in 2013 | Mean ED SBP 124mmHg in 2002; 132mmHg in 2013     | 25%           | NA                | ED            | NA                       | NA                                                                                  |
| <b>Baksaas-Aasen et al.</b> <sup>67</sup> | 2019             | 2008-2014    | INR > 1.2                                                                              | 2287 trauma activation patients, multicenter | 6 major trauma centers in 5 countries: United Kingdom, Denmark, Germany, Netherlands, Norway | 85%          | 13                        | 15% required >3 RBC/12 hours                     | 7%            | NA                | ED            | NA                       | NA                                                                                  |
| <b>Sumistawski et al.</b> <sup>68</sup>   | 2019             | 2011-2017    | Conventional: INR ≥ 1.4 and/or PTT ≥ 35 s<br>TEG: ACT >128 s, angle <65°, or MA <55 mm | 839 trauma activation patients, multicenter  | US                                                                                           | 51%          | 17                        | Base deficit between 4 (no TIC) and 7mEq/L (TIC) | 33%           | 26%               | ED            | TBI associated with TIC  | NA                                                                                  |
| <b>Ishii et al.</b> <sup>69</sup>         | 2019             | 2013-2015    | Fibrinogen <130mg/dL, D-dimer >=118µg/mL                                               | 666 adults with blunt trauma, multicenter    | Japan                                                                                        | 100%         | 26                        | 20%                                              | 17%           | 44%               | ED            | TBI more frequent in TIC | Overall: field intubation, ED hypotension; TBI: head AIS, field and ED hypotension; |

| Study                               | Publication year | Study period | TIC definition                                                                                                              | Population                                                                     | Country | Blunt trauma | ISS                                                | Hypotension/Shock                                              | TIC Incidence                                                                                            | TIC Case-fatality     | Timing of TIC | Injury pattern                                      | Risk Factors for TIC                                                                                                                                            |
|-------------------------------------|------------------|--------------|-----------------------------------------------------------------------------------------------------------------------------|--------------------------------------------------------------------------------|---------|--------------|----------------------------------------------------|----------------------------------------------------------------|----------------------------------------------------------------------------------------------------------|-----------------------|---------------|-----------------------------------------------------|-----------------------------------------------------------------------------------------------------------------------------------------------------------------|
| <b>Albert et al.</b> <sup>70</sup>  | 2019             | 2014-2016    | INR) ≥ 1.27,<br>PT ≥ 16.7s,<br>PTT ≥ 28.8s                                                                                  | 120 patients with isolated TBI, age 20-50 years, single center                 | India   | NA           | NA                                                 | 28%                                                            | 42%                                                                                                      | 44%                   | ED            | NA                                                  | NA                                                                                                                                                              |
| <b>Samuels et al.</b> <sup>71</sup> | 2019             | 2014-2018    | TEG<br>ACT>128 s,<br>MA <55 mm,<br>angle <65°;<br>LY30 > 7.6%<br>Conventional coagulation assays:<br>INR>1.3 and<br>PTT>30s | 572 trauma activation patients with New Injury Severity Score>8, single center | US      | 82%          | NISS 25 to 43 depending on absence/presence of TBI | Median SBP 105 to 134mmHg depending on absence/presence of SBP | 23% INR>1.3;<br>32% PTT>30s;<br>37% ACT>128s;<br>19% MA<55mm;<br>19% Angle<65°;<br>10% Hyperfibrinolysis | NA                    | field or ED   | Isolated TBI associated with delayed clot formation | TBI associated with delay in clot initiation, fibrin cross-linking, hypofibrinogenemia, deficiencies in the intrinsic pathway, no abnormalities in fibrinolysis |
| <b>Leeper et al.</b> <sup>72</sup>  | 2019             | 2015-2019    | hyperfibrinolysis LY30 >=3.0%                                                                                               | 285 children, single center                                                    | US      | 75%          | 17                                                 | 4%                                                             | 19% with hyperfibrinolysis                                                                               | Hyperfibrinolysis 32% | ED            | NA                                                  | NA                                                                                                                                                              |

| Study                      | Publication year | Study period | TIC definition                                          | Population                                                                                                                          | Country                                                                                       | Blunt trauma                         | ISS              | Hypotension/Shock                      | TIC Incidence                                              | TIC Case-fatality                                           | Timing of TIC | Injury pattern | Risk Factors for TIC                                                                                                                                          |
|----------------------------|------------------|--------------|---------------------------------------------------------|-------------------------------------------------------------------------------------------------------------------------------------|-----------------------------------------------------------------------------------------------|--------------------------------------|------------------|----------------------------------------|------------------------------------------------------------|-------------------------------------------------------------|---------------|----------------|---------------------------------------------------------------------------------------------------------------------------------------------------------------|
| Cohen et al. <sup>73</sup> | 2019             | 2012-2013    | INR > 1.2, EXTEM A5 <=35mm, EXTEM LI30 < 97%            | 40 patients: US and Coalition military personnel identified as having war injuries resulting in activation of DCR                   | Craig Air Force Theater Hospital – Bagram, Kandahar NATO Hospital in the Afghaniestan Theater | IED 80%; rocket propelled grenade 8% | 22               | 100%                                   | 70%                                                        | NA                                                          | ED            | NA             | NA                                                                                                                                                            |
| Thorn et al. <sup>74</sup> | 2019             | 2012-2016    | INR > 1.5 or PTT > 60s                                  | 15370 adults with ISS>15, multicenter                                                                                               | Germany                                                                                       | 93%                                  | 25               | Median SBP TIC 116mmHg non-TIC 130mmHg | 11%                                                        | NA                                                          | ED            | NA             | Modified COAST score: on-scene > 45 min or pre-hospital time > 90 min; low prehospital SBP; low ED temperature; pre-hospital thorax drain; abdominal AIS > 3. |
| Reed et al. <sup>75</sup>  | 2019             | 2012-2017    | Age-adjusted abnormal values of INR, PTT and fibrinogen | 156 children (<14yrs), 1524 adults, 303 older adults (>=65years), single center<br>545 pediatric polytrauma patients, single center | US                                                                                            | 75%                                  | 17               | Median Base Excess -3 mEq/l            | Abnormal INR 37%; Abnormal PTT 6%; Abnormal fibrinogen 24% | Abnormal INR 14%; Abnormal PTT 52%; Abnormal fibrinogen 15% | ED            | NA             | Penetrating injury, ISS, Hematocrit, age<14yrs or >=65yrs                                                                                                     |
| Nair et al. <sup>76</sup>  | 2020             | 2006-2015    | INR>1.2                                                 | polytrauma patients, single center                                                                                                  | US                                                                                            | 91%                                  | TIC ISS 25; non- | NA                                     | 16%                                                        | 26%                                                         | ED            | NA             | Non-blunt trauma (penetrating or                                                                                                                              |

| Study                                | Publication year | Study period | TIC definition                                                                    | Population                                           | Country   | Blunt trauma | ISS                      | Hypotension/Shock | TIC Incidence | TIC Case-fatality | Timing of TIC | Injury pattern | Risk Factors for TIC            |
|--------------------------------------|------------------|--------------|-----------------------------------------------------------------------------------|------------------------------------------------------|-----------|--------------|--------------------------|-------------------|---------------|-------------------|---------------|----------------|---------------------------------|
| <b>Driessen et al.</b> <sup>77</sup> | 2020             | 2009-2016    | Quick's value < 70% (INR > 1.4) or PTT ≥ 40 or platelet ≤ 100,000/mm <sup>3</sup> | 733 children, multicenter                            | Germany   | 92 to 97%    | TIC<br>ISS 9<br>27 to 36 | NA                | 14%           | 42 to 49%         | ED            | TBI            | unknown),<br>ISS                |
| <b>James et al.</b> <sup>78</sup>    | 2020             | 2010-2016    | Age-adjusted abnormal values of INR, PT, PTT and platelets                        | 155 children with isolated, blunt TBI, single center | Singapore | 100%         | 16                       | 14%               | 21%           | 24%               | ED            | Isolated TBI   | AIS head, hypotension at triage |

Quick's value of 70% equates to an INR of 1.4<sup>66</sup>; AIS: Abbreviated Injury Scale; APACHE II: Acute Physiology and Chronic Health Evaluation Score II; BMI: body mass index; ED: emergency department; FDP: fibrin degradation products; GCS: Glasgow coma scale; ISS: injury severity score; NA: not available; PT: prothrombin time; PTT: activated partial thromboplastin time; SAH: subarachnoid hemorrhage; TBI: traumatic brain injury; TRU: trauma resuscitation unit; TT: thrombin time.

JAAM DIC criteria: (1) SIRS ≥ 3 points, (2) platelet < 80,000/mm<sup>3</sup> or (3) platelet < 120,000/mm<sup>3</sup>, (4) INR ≥ 1.2, (5) fibrinogen and fibrin degradation products (FDP) ≥ 25 µg/mL or (6) FDP ≥ 10 µg/mL.

## References

1. Sauaia A, Moore FA, Moore EE, et al. Epidemiology of trauma deaths: a reassessment. *J Trauma*. 1995;38(2):185-193.
2. Shackford SR, Mackerzie RC, Holbrook TL, et al. The epidemiology of traumatic death. A population-based analysis. *Arch Surg*. 1993;128(5):571-575.
3. Stewart RM, Myers JG, Dent DL, et al. Seven hundred fifty-three consecutive deaths in a level I trauma center: the argument for injury prevention. *J Trauma*. 2003;54(1):66-70; discussion 70-61.
4. Tien HC, Spencer F, Tremblay LN, Rizoli SB, Brenneman FD. Preventable deaths from hemorrhage at a level I Canadian trauma center. *J Trauma*. 2007;62(1):142-146.
5. Evans JA, van Wessem KJ, McDougall D, Lee KA, Lyons T, Balogh ZJ. Epidemiology of traumatic deaths: comprehensive population-based assessment. *World J Surg*. 2010;34(1):158-163.
6. Consunji RJ, Serrato Marinas JP, Aspuria Maddumba JR, Dela Paz DA, Jr. A profile of deaths among trauma patients in a university hospital: the Philippine experience. *J Inj Violence Res*. 2011;3(2):85-89.
7. Soreide K, Kruger AJ, Vardal AL, Ellingsen CL, Soreide E, Lossius HM. Epidemiology and contemporary patterns of trauma deaths: changing place, similar pace, older face. *World J Surg*. 2007;31(11):2092-2103.
8. Kahl JE, Calvo RY, Sise MJ, Sise CB, Thorndike JF, Shackford SR. The changing nature of death on the trauma service. *J Trauma Acute Care Surg*. 2013;75(2):195-201.
9. Kleber C, Giesecke MT, Tsokos M, et al. Overall distribution of trauma-related deaths in Berlin 2010: advancement or stagnation of German trauma management? *World J Surg*. 2012;36(9):2125-2130.
10. Trajano AD, Pereira BM, Fraga GP. Epidemiology of in-hospital trauma deaths in a Brazilian university hospital. *BMC Emerg Med*. 2014;14:22.
11. Davis JS, Satahoo SS, Butler FK, et al. An analysis of prehospital deaths: Who can we save? *J Trauma Acute Care Surg*. 2014;77(2):213-218.
12. Roberts DJ, Harzan C, Kirkpatrick AW, et al. One thousand consecutive in-hospital deaths following severe injury: Has the etiology of traumatic inpatient death changed in Canada? *Canadian journal of surgery Journal canadien de chirurgie*. 2018;61(3):150-152.
13. Arslan ED, Kaya E, Sonmez M, et al. Assessment of traumatic deaths in a level one trauma center in Ankara, Turkey. *Eur J Trauma Emerg Surg*. 2015;41(3):319-323.
14. Oyeniyi BT, Fox EE, Scerbo M, Tomasek JS, Wade CE, Holcomb JB. Trends in 1029 trauma deaths at a level I trauma center: Impact of a bleeding control bundle of care. *Injury*. 2017;48(1):5-12.
15. Drake SA, Holcomb JB, Yang Y, et al. Establishing a Regional Trauma Preventable/Potentially Preventable Death Rate. *Ann Surg*. 2018.
16. Jochems D, Leenen LPH, Hietbrink F, Houwert RM, van Wessem KJP. Increased reduction in exsanguination rates leaves brain injury as the only major cause of death in blunt trauma. *Injury*. 2018;49(9):1661-1667.
17. Calicut RA, Kornblith LZ, Conroy AS, et al. The why and how our trauma patients die: A prospective Multicenter Western Trauma Association study. *J Trauma Acute Care Surg*. 2019;86(5):864-870.
18. Raum MR, Bouillon B, Rixen D, et al. The Prognostic Value of Prothrombin Time in Predicting Survival after Major Trauma: a Prospective Analysis of 1,351 Patients from the German Trauma Registry. *European Journal of Trauma*. 2001;27(3):110-116.
19. Keller MS, Fendya DG, Weber TR. Glasgow Coma Scale predicts coagulopathy in pediatric trauma patients. *Semin Pediatr Surg*. 2001;10(1):12-16.
20. Brohi K, Singh J, Heron M, Coats T. Acute traumatic coagulopathy. *J Trauma Acute Care Surg*. 2003;54(6):1127-1130.
21. MacLeod JB, Lynn M, McKenney MG, Cohn SM, Murtha M. Early coagulopathy predicts mortality in trauma. *J Trauma Acute Care Surg*. 2003;55(1):39-44.
22. Carrick MM, Tyroch AH, Youens CA, Handley T. Subsequent development of thrombocytopenia and coagulopathy in moderate and severe head injury: support for serial laboratory examination. *J Trauma*. 2005;58(4):725-729; discussion 729-730.



23. Affonseca CA, Carvalho LF, Guerra SD, Ferreira AR, Goulart EM. Coagulation disorder in children and adolescents with moderate to severe traumatic brain injury. *J Pediatr (Rio J)*. 2007;83(3):274-282.
24. Rugeri L, Levriat A, David JS, et al. Diagnosis of early coagulation abnormalities in trauma patients by rotation thrombelastography. *J Thromb Haemost*. 2007;5(2):289-295.
25. Maegele M, Lefering R, Yucel N, et al. Early coagulopathy in multiple injury: an analysis from the German Trauma Registry on 8724 patients. *Injury*. 2007;38(3):298-304.
26. Niles SE, McLaughlin DF, Perkins JG, et al. Increased mortality associated with the early coagulopathy of trauma in combat casualties. *J Trauma*. 2008;64(6):1459-1463; discussion 1463-1455.
27. Kashuk JL, Moore EE, Johnson JL, et al. Postinjury life threatening coagulopathy: is 1:1 fresh frozen plasma-packed red blood cells the answer? *J Trauma*. 2008;65(2):261-270; discussion 270-261.
28. Talving P, Benfield R, Hadjizacharia P, Inaba K, Chan LS, Demetriades D. Coagulopathy in severe traumatic brain injury: a prospective study. *J Trauma*. 2009;66(1):55-61; discussion 61-52.
29. Frith D, Goslings JC, Gaarder C, et al. Definition and drivers of acute traumatic coagulopathy: clinical and experimental investigations. *J Thromb Haemost*. 2010;8(9):1919-1925.
30. Wafaisade A, Lefering R, Tjardes T, et al. Acute coagulopathy in isolated blunt traumatic brain injury. *Neurocrit Care*. 2010;12(2):211-219.
31. Wafaisade A, Wutzler S, Lefering R, et al. Drivers of acute coagulopathy after severe trauma: a multivariate analysis of 1987 patients. *Emerg Med J*. 2010;27(12):934-939.
32. Dirks J, Jørgensen H, Jensen CH, Ostrowski SR, Johansson PI. Blood product ratio in acute traumatic coagulopathy--effect on mortality in a Scandinavian level I trauma centre. *Scand J Trauma Resusc Emerg Med*. 2010;18:65.
33. Jeger V, Urwyler N, Zimmermann H, Exadaktylos AK. Trauma-induced coagulopathy in severely injured patients: knowledge lost in translation? *Emerg Med J*. 2010;27(7):551-552.
34. Tauber H, Innerhofer P, Breitkopf R, et al. Prevalence and impact of abnormal ROTEM® assays in severe blunt trauma: results of the 'Diagnosis and Treatment of Trauma-Induced Coagulopathy (DIA-TRE-TIC) study'. *Br J Anaesth*. 2011;107(3):378-387.
35. Johansson PI, Sørensen AM, Perner A, et al. Disseminated intravascular coagulation or acute coagulopathy of trauma shock early after trauma? An observational study. *Crit Care*. 2011;15(6):R272.
36. Greuters S, van den Berg A, Franschman G, et al. Acute and delayed mild coagulopathy are related to outcome in patients with isolated traumatic brain injury. *Crit Care*. 2011;15(1):R2.
37. Patregnani JT, Borgman MA, Maegele M, Wade CE, Blackburne LH, Spinella PC. Coagulopathy and shock on admission is associated with mortality for children with traumatic injuries at combat support hospitals. *Pediatr Crit Care Med*. 2012;13(3):273-277.
38. Hendrickson JE, Shaz BH, Pereira G, et al. Coagulopathy is prevalent and associated with adverse outcomes in transfused pediatric trauma patients. *J Pediatr*. 2012;160(2):204-209.e203.
39. Mitra B, Cameron PA, Mori A, Fitzgerald M. Acute coagulopathy and early deaths post major trauma. *Injury*. 2012;43(1):22-25.
40. Peiniger S, Nienaber U, Lefering R, et al. Glasgow Coma Scale as a predictor for hemocoagulative disorders after blunt pediatric traumatic brain injury. *Pediatr Crit Care Med*. 2012;13(4):455-460.
41. Genét GF, Johansson PI, Meyer MA, et al. Trauma-induced coagulopathy: standard coagulation tests, biomarkers of coagulopathy, and endothelial damage in patients with traumatic brain injury. *J Neurotrauma*. 2013;30(4):301-306.
42. Chhabra G, Sharma S, Subramanian A, Agrawal D, Sinha S, Mukhopadhyay AK. Coagulopathy as prognostic marker in acute traumatic brain injury. *J Emerg Trauma Shock*. 2013;6(3):180-185.
43. Xu SX, Wang L, Zhou GJ, Zhang M, Gan JX. Risk factors and clinical significance of trauma-induced coagulopathy in ICU patients with severe trauma. *Eur J Emerg Med*. 2013;20(4):286-290.

44. Alexiou GA, Lianos G, Fotakopoulos G, Michos E, Pachatouridis D, Voulgaris S. Admission glucose and coagulopathy occurrence in patients with traumatic brain injury. *Brain Inj*. 2014;28(4):438-441.
45. Neal MD, Brown JB, Moore EE, et al. Prehospital use of nonsteroidal anti-inflammatory drugs (NSAIDs) is associated with a reduced incidence of trauma-induced coagulopathy. *Ann Surg*. 2014;260(2):378-382.
46. MacLeod JB, Winkler AM, McCoy CC, Hillyer CD, Shaz BH. Early trauma induced coagulopathy (ETIC): prevalence across the injury spectrum. *Injury*. 2014;45(5):910-915.
47. Moore HB, Moore EE, Gonzalez E, et al. Hyperfibrinolysis, physiologic fibrinolysis, and fibrinolysis shutdown: the spectrum of postinjury fibrinolysis and relevance to antifibrinolytic therapy. *J Trauma Acute Care Surg*. 2014;77(6):811-817; discussion 817.
48. Tonglet ML, Minon JM, Seidel L, Poplavsky JL, Vergnion M. Prehospital identification of trauma patients with early acute coagulopathy and massive bleeding: results of a prospective non-interventional clinical trial evaluating the Trauma Induced Coagulopathy Clinical Score (TICCS). *Crit Care*. 2014;18(6):648.
49. Kutcher ME, Howard BM, Sperry JL, et al. Evolving beyond the vicious triad: Differential mediation of traumatic coagulopathy by injury, shock, and resuscitation. *J Trauma Acute Care Surg*. 2015;78(3):516-523.
50. de Oliveira Manoel AL, Neto AC, Veigas PV, Rizoli S. Traumatic brain injury associated coagulopathy. *Neurocrit Care*. 2015;22(1):34-44.
51. Peltan ID, Vande Vusse LK, Maier RV, Watkins TR. An International Normalized Ratio-Based Definition of Acute Traumatic Coagulopathy Is Associated With Mortality, Venous Thromboembolism, and Multiple Organ Failure After Injury. *Crit Care Med*. 2015;43(7):1429-1438.
52. Khan S, Davenport R, Raza I, et al. Damage control resuscitation using blood component therapy in standard doses has a limited effect on coagulopathy during trauma hemorrhage. *Intensive Care Med*. 2015;41(2):239-247.
53. Hagemo JS, Christiaans SC, Stanworth SJ, et al. Detection of acute traumatic coagulopathy and massive transfusion requirements by means of rotational thromboelastometry: an international prospective validation study. *Crit Care*. 2015;19(1):97.
54. Holcomb JB, Tilley BC, Baraniuk S, et al. Transfusion of plasma, platelets, and red blood cells in a 1:1:1 vs a 1:1:2 ratio and mortality in patients with severe trauma: the PROPPR randomized clinical trial. *JAMA*. 2015;313(5):471-482.
55. Strumwasser A, Speer AL, Inaba K, et al. The impact of acute coagulopathy on mortality in pediatric trauma patients. *J Trauma Acute Care Surg*. 2016;81(2):312-318.
56. Peltan ID, Rowhani-Rahbar A, Vande Vusse LK, et al. Development and validation of a prehospital prediction model for acute traumatic coagulopathy. *Crit Care*. 2016;20(1):371-371.
57. Moore HB, Moore EE, Liras IN, et al. Acute Fibrinolysis Shutdown after Injury Occurs Frequently and Increases Mortality: A Multicenter Evaluation of 2,540 Severely Injured Patients. *J Am Coll Surg*. 2016;222(4):347-355.
58. David JS, Voiglio EJ, Cesario E, et al. Prehospital parameters can help to predict coagulopathy and massive transfusion in trauma patients. *Vox Sang*. 2017;112(6):557-566.
59. Koami H, Sakamoto Y, Yamada KC, et al. What factor within the Japanese Association for Acute Medicine (JAAM) disseminated intravascular coagulation (DIC) criteria is most strongly correlated with trauma induced DIC? A retrospective study using thromboelastometry in a single center in Japan. *Eur J Trauma Emerg Surg*. 2017;43(4):431-438.
60. Mistral T, Boué Y, Bosson JL, et al. Performance of point-of-care international normalized ratio measurement to diagnose trauma-induced coagulopathy. *Scand J Trauma Resusc Emerg Med*. 2017;25(1):59.
61. Mador B, Nascimento B, Hollands S, Rizoli S. Blood transfusion and coagulopathy in geriatric trauma patients. *Scand J Trauma Resusc Emerg Med*. 2017;25(1):33-33.
62. Liras IN, Caplan HW, Stensballe J, Wade CE, Cox CS, Cotton BA. Prevalence and Impact of Admission Acute Traumatic Coagulopathy on Treatment Intensity, Resource Use, and Mortality: An Evaluation of 956 Severely Injured Children and Adolescents. *J Am Coll Surg*. 2017;224(4):625-632.
63. Moore EE, Chin TL, Chapman MC, et al. Plasma first in the field for postinjury hemorrhagic shock. *Shock*. 2014;41 Suppl 1:35-38.
64. Dwivedi AK, Sharma A, Sinha VD. Comparative Study of Derangement of Coagulation Profile between Adult and Pediatric Population in Moderate to Severe Traumatic Brain Injury: A Prospective Study in a Tertiary Care Trauma Center. *Asian J Neurosurg*. 2018;13(4):1123-1127.

65. Sperry JL, Guyette FX, Brown JB, et al. Prehospital Plasma during Air Medical Transport in Trauma Patients at Risk for Hemorrhagic Shock. *N Engl J Med*. 2018;379(4):315-326.
66. Fröhlich M, Mutschler M, Caspers M, et al. Trauma-induced coagulopathy upon emergency room arrival: still a significant problem despite increased awareness and management? *Eur J Trauma Emerg Surg*. 2019;45(1):115-124.
67. Baksaas-Aasen K, Van Dieren S, Balvers K, et al. Data-driven Development of ROTEM and TEG Algorithms for the Management of Trauma Hemorrhage: A Prospective Observational Multicenter Study. *Ann Surg*. 2019;270(6):1178-1185.
68. Sumiowski JJ, Christie SA, Kornblith LZ, et al. Discrepancies between conventional and viscoelastic assays in identifying trauma-induced coagulopathy. *Am J Surg*. 2019;217(6):1037-1041.
69. Ishii K, Kinoshita T, Kiridume K, et al. Impact of initial coagulation and fibrinolytic markers on mortality in patients with severe blunt trauma: a multicentre retrospective observational study. *Scand J Trauma Resusc Emerg Med*. 2019;27(1):25.
70. Albert V, Arulsevi S, Agrawal D, Pati HP, Pandey RM. Early posttraumatic changes in coagulation and fibrinolysis systems in isolated severe traumatic brain injury patients and its influence on immediate outcome. *Hematol Oncol Stem Cell Ther*. 2019;12(1):32-43.
71. Samuels JM, Moore EE, Silliman CC, et al. Severe traumatic brain injury is associated with a unique coagulopathy phenotype. *J Trauma Acute Care Surg*. 2018.
72. Leeper CM, Strotmeyer SJ, Neal MD, Gaines BA. Window of Opportunity to Mitigate Trauma-induced Coagulopathy: Fibrinolysis Shutdown not Prevalent Until 1 Hour Post-injury. *Ann Surg*. 2019;270(3):528-534.
73. Cohen J, Scorer T, Wright Z, et al. A prospective evaluation of thromboelastometry (ROTEM) to identify acute traumatic coagulopathy and predict massive transfusion in military trauma patients in Afghanistan. *Transfusion*. 2019;59(S2):1601-1607.
74. Thorn S, Lefering R, Maegele M, Gruen RL, Mitra B. Early prediction of acute traumatic coagulopathy: a validation of the COAST score using the German Trauma Registry. *Eur J Trauma Emerg Surg*. 2019.
75. Reed CR, Williamson H, Vatsaas C, et al. Higher mortality in pediatric and adult trauma patients with traumatic coagulopathy, using age-adjusted diagnostic criteria. *Surgery*. 2019;165(6):1108-1115.
76. Nair A, Flori H, Cohen MJ. Characterization of organ dysfunction and mortality in pediatric patients with trauma with acute traumatic coagulopathy. *Trauma surgery & acute care open*. 2020;5(1):e000382.
77. Driessen A, Wafaisade A, Lefering R, et al. Mechanism, frequency, transfusion and outcome of severe trauma in coagulopathic paediatric patients. *Eur J Trauma Emerg Surg*. 2020:1-9.
78. James V, Chong SL, Shetty SS, Ong GY. Early coagulopathy in children with isolated blunt head injury is associated with mortality and poor neurological outcomes. *J Neurosurg Pediatr*. 2020:1-7.
